# Supplementary material for: Intersecting Trajectories: Childhood ADHD, Socioeconomic Deprivation, and Distinct Multimorbidity Patterns in Females
Source: Research Square preprint supplement (doi:10.21203/rs.3.rs-7589898/v1), 2025-10-22
Supplement: Supplementary file 1 [file 5a3fc0d03127de0298544a74.docx]

Supplementary Material

- sFigure 1. Cohort flow diagram
- sTable 1. Included Physical and Mental LTCs
- sTable 2. BIC Values for Different Latent Class Models in ADHD and Non-ADHD Group
- sFigure 2A. No-ADHD Group BIC Values
- sFigure 2B. No-ADHD Group BIC Values
- sTable 3. Probabilities of LTCs, and Numbers and Percentages of Individuals with those Conditions in Each Cluster

sFigure 1. Cohort flow diagram


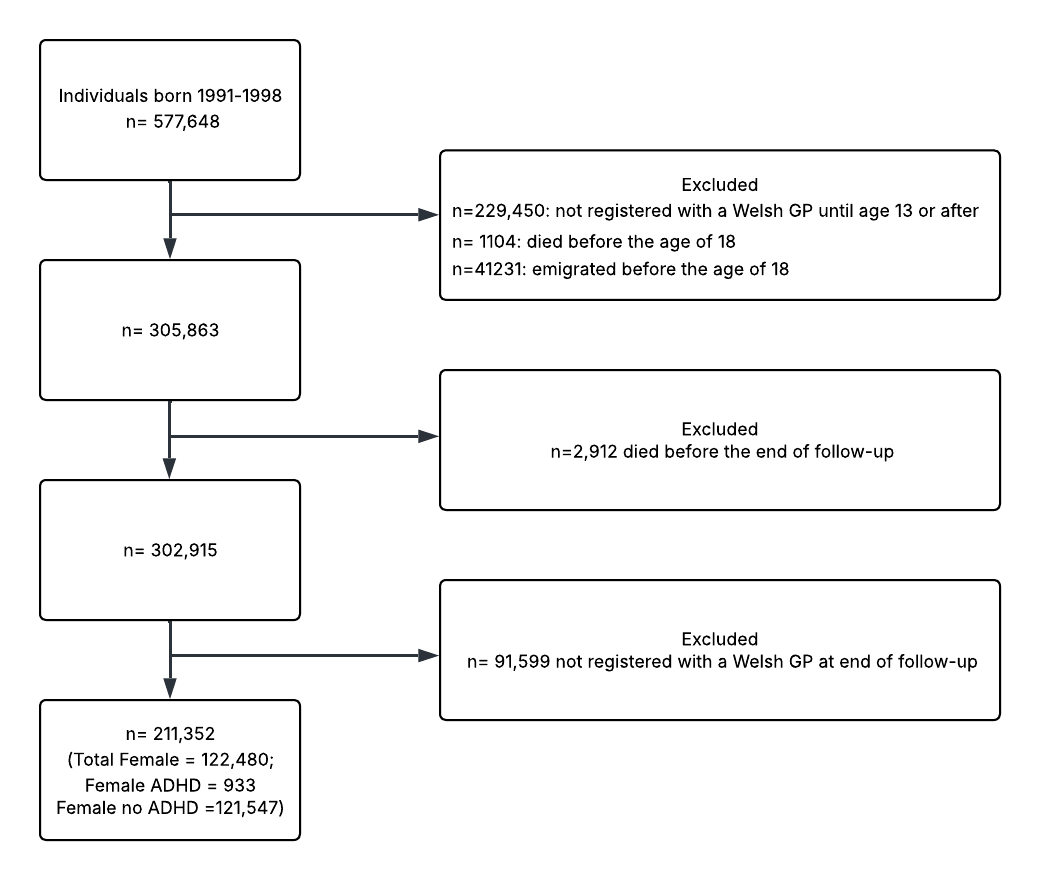


| sTable 1. Included Physical and Mental LTCs | |
| --- | --- |
| **Included Physical Long-Term Conditions** | |
| **Neoplasms** | **Musculoskeletal Conditions** |
| Cervical carcinoma in situ | Enthesopathies and synovial disorders |
| Primary malignancy breast | Fibromyalgia |
| Primary malignancy other skin and subcutaneous tissue | Gout |
| Primary malignancy others | Intervertebral disc disorders |
| **Haematological Conditions** | Osteoarthritis |
| Iron deficiency with and without anaemia | Osteoporosis |
| Other anaemias | Rheumatoid arthritis |
| Vitamin B12 deficiency with and without anaemia | Spondylosis |
| **Endocrine/Metabolic Conditions** | **Genitourinary Conditions** |
| Obesity | Chronic kidney disease |
| Polycystic ovarian syndrome | Dysmenorrhoea |
| Thyroid disease | Endometriosis |
| Type 2 diabetes | Erectile dysfunction |
| **Neurological Conditions** | Female genital prolapse |
| Chronic fatigue | Female infertility |
| Epilepsy | Male infertility |
| Painful conditions | Menorrhagia and polymenorrhoea |
| Sleep apnoea | Urinary incontinence |
| **Eye Conditions** | Urolithiasis |
| Diabetic eye disease | **Gastrointestinal Conditions** |
| Visual impairment and blindness | Constipation |
| **Ear Conditions** | Cholelithiasis |
| Hearing loss | Diverticular disease of intestine |
| Migraine | Gastritis and duodenitis |
| Tinnitus | Gastro-oesophageal reflux disease |
| **Cardiovascular Conditions** | Irritable bowel syndrome |
| Atrial fibrillation and flutter | Non-alcoholic fatty liver disease and steatohepatitis |
| Cerebrovascular disease | Oesophagitis and oesophageal ulcer |
| Coronary heart disease | Peptic ulcer disease |
| Heart failure | **Dermatological Conditions** |
| Heart valve disease non-rheumatic | Atopic Dermatitis |
| Hypertension | Chronic ulcer of the skin |
| Peripheral venous and lymphatic disease | Psoriasis |
| Venous thromboembolism | Rosacea |
| **Respiratory Conditions** | Seborrheic dermatitis |
| Allergic and chronic rhinitis | Urticaria |
| Asthma |  |
| Chronic obstructive pulmonary disease |  |
| Chronic sinusitis |  |
| **Included Mental Long-Term Conditions** | |
| **Common Mental Disorders** | **Severe and Enduring Mental Illnesses** |
| Anxiety | Bipolar Affective Disorder |
| Depression | Personality Disorders |
| Eating Disorders | Psychotic Disorders |
| Obsessive Compulsive Disorder | **Addiction Disorders** |
| PTSD | Alcohol Use Disorder |
| Somatoform Disorders | Drug Use Disorder |

sTable 2. BIC Values for Different Latent Class Models in ADHD and Non-ADHD Group

| Number of Classes | BIC Values | |
| --- | --- | --- |
| No ADHD Group | ADHD Group |
| 1 | 118290.1 | 17602.50 |
| 2 | 116636.4 | 17531.84 |
| 3 | 115252.9 | 18285.41 |
| 4 | 115481.1 | 18094.72 |
| 5 | 115507.7 | 18328.45 |
| 6 | 116475.0 | 18776.61 |
| 7 | 116465.7 | 19050.20 |
| 8 | 116623.5 | 19349.38 |
| 9 | 117317.3 | 19664.85 |
| 10 | 118743.2 | 20051.18 |

| sTable 3. Probabilities of LTCs, and Numbers and Percentages of Individuals with those Conditions in Each Cluster | | | | | | | | | | | | | | | | | | | |
| --- | --- | --- | --- | --- | --- | --- | --- | --- | --- | --- | --- | --- | --- | --- | --- | --- | --- | --- | --- |
| **Cluster** | | | | | | | | | | | | | | | | | | | |
| **ADHD 1** | | | | **ADHD 2** | | | | **No ADHD 1** | | | | **No ADHD 2** | | | | **No ADHD 3** | | | |
| **LTC** | **Prob** | **n** | **%** | **LTC** | **Prob** | **n** | **%** | **LTC** | **Prob** | **n** | **%** | **LTC** | **Prob** | **n** | **%** | **LTC** | **Prob** | **n** | **%** |
| Depression | 0.944 | 294 | 95.5 | Depression | 0.503 | 290 | 50.8 | Depression | 0.786 | 2308 | 83 | Depression | 0.786 | 1263 | 77.4 | Obesity | 0.306 | 1174 | 31.5 |
| Anxiety | 0.905 | 282 | 91.6 | Anxiety | 0.477 | 275 | 48.2 | Anxiety | 0.73 | 2079 | 74.8 | Anxiety | 0.73 | 1213 | 74.3 | Dermatitis | 0.282 | 1069 | 28.7 |
| Obesity | 0.531 | 167 | 54.2 | Obesity | 0.291 | 166 | 29.1 | Dermatitis | 0.243 | 659 | 23.7 | Obesity | 0.53 | 890 | 54.5 | Asthma | 0.136 | 519 | 13.9 |
| Dermatitis | 0.523 | 164 | 53.2 | Dermatitis | 0.252 | 145 | 25.4 | Obesity | 0.216 | 571 | 20.5 | Dermatitis | 0.51 | 856 | 52.5 | Ch. Rhinitis | 0.115 | 441 | 11.8 |
| Asthma | 0.422 | 134 | 43.5 | Asthma | 0.205 | 116 | 20.3 | PTSD | 0.134 | 372 | 13.4 | Asthma | 0.309 | 532 | 32.6 | Ch. Sinusitis | 0.086 | 331 | 8.9 |
| SUD | 0.354 | 115 | 37.3 | Menorrhagia | 0.101 | 59 | 10.3 | Asthma | 0.138 | 360 | 12.9 | Migraine | 0.258 | 446 | 27.3 | Anxiety | 0.109 | 331 | 8.9 |
| Personality Dis. | 0.324 | 109 | 35.4 | Ch. Rhinitis | 0.104 | 58 | 10.2 | Migraine | 0.103 | 278 | 10 | Somat. Dis. | 0.257 | 443 | 27.1 | Migraine | 0.088 | 324 | 8.7 |
| PTSD | 0.322 | 105 | 34.1 | PTSD | 0.092 | 50 | 8.8 | SUD | 0.104 | 273 | 9.8 | Menorrhagia | 0.253 | 434 | 26.6 | Menorrhagia | 0.074 | 271 | 7.3 |
| GORD | 0.271 | 89 | 28.9 | Ch. Sinusitis | 0.081 | 47 | 8.2 | Menorrhagia | 0.094 | 259 | 9.3 | PTSD | 0.246 | 415 | 25.4 | Seb. Dermatitis | 0.062 | 240 | 6.4 |
| Menorrhagia | 0.272 | 85 | 27.6 | Migraine | 0.081 | 46 | 8.1 | Ch. Sinusitis | 0.08 | 209 | 7.5 | GORD | 0.228 | 397 | 24.3 | Ch. Skin Ulcer | 0.062 | 239 | 6.4 |
| Migraine | 0.264 | 84 | 27.3 | IBS | 0.079 | 45 | 7.9 | Ch. Rhinitis | 0.075 | 197 | 7.1 | Ch. Rhinitis | 0.234 | 395 | 24.2 | IBS | 0.054 | 204 | 5.5 |
| Ch. Rhinitis | 0.2 | 64 | 20.8 | SUD | 0.065 | 35 | 6.1 | IBS | 0.062 | 168 | 6 | Ch. Sinusitis | 0.229 | 388 | 23.8 | Epilepsy | 0.049 | 187 | 5 |
| Somat. Dis. | 0.195 | 64 | 20.8 | Epilepsy | 0.063 | 34 | 6 | Ensethopathy | 0.055 | 156 | 5.6 | IBS | 0.213 | 364 | 22.3 | Ensethopathy | 0.046 | 166 | 4.5 |
| IBS | 0.199 | 63 | 20.5 | Seb. Dermatitis | 0.058 | 33 | 5.8 | PCOS | 0.04 | 116 | 4.2 | ME | 0.19 | 328 | 20.1 | PTSD | 0.044 | 158 | 4.2 |
| Gastritis | 0.143 | 45 | 14.6 | RA | 0.054 | 31 | 5.4 | Dysmenorrhoea | 0.037 | 99 | 3.6 | SUD | 0.163 | 275 | 16.9 | Depression | 0.060 | 63 | 1.7 |
